# Supplementary material
Source: PubMed Central journal article supplement (PMC4810440)
Supplement: NIHMS214479-supplement-01.pdf [file NIHMS214479-supplement-01.pdf]

DOI: 10.1038/ncb1858

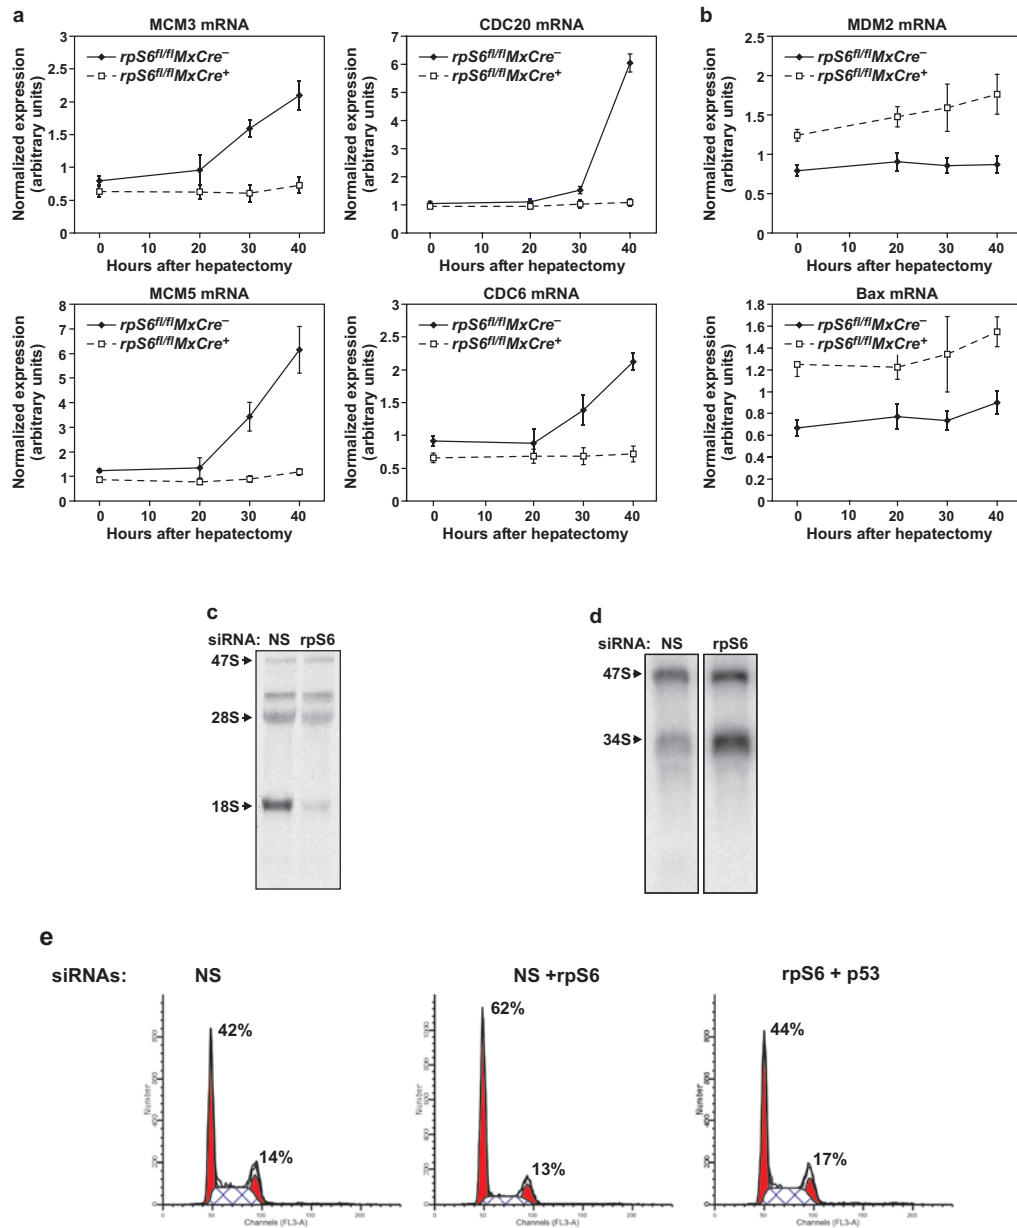

**Figure S1** P53 dependent inhibition of cell cycle progression by S6 depletion  
**a** Expression kinetics of MCM5, MCM3, CDC20 and CDC6 mRNAs following partial hepatectomy in the livers of *rpS6<sup>fl/fl</sup>MxCre<sup>-</sup>* and *rpS6<sup>fl/fl</sup>MxCre<sup>+</sup>* mice, as measured by hybridization of DNA microarrays. The data are presented as mean values of three independent experiments  $\pm$  SEM. **b** The kinetics of the expression of the MDM2 and Bax mRNAs, following partial hepatectomy, in the livers of *rpS6<sup>fl/fl</sup>MxCre<sup>-</sup>* and *rpS6<sup>fl/fl</sup>MxCre<sup>+</sup>* mice as measured by hybridization of DNA microarrays. The data are presented as the mean values of three independent experiments  $\pm$  SEM. **c** Autoradiogram of a northern blot showing  $^3\text{H}$ -labelled RNA extracted from A549 cells transfected for 24 hrs with either NS or rpS6 siRNA2 and subjected to a pulse-chase with  $^3\text{H}$ -uridine. Cells were pulsed for 45min with 1.2  $\mu\text{Ci/ml}$  of [5, 6- $^3\text{H}$ ]-uridine

(specific activity 37 Ci/mmol, Amersham, Biosciences) and then chased for 2hrs in the absence of radioactive uridine. The amount of extracted total RNA corresponding to 10,000 cpm was processed for transfer to Hybond N+ membrane (Amersham Biosciences) After spraying with EN<sup>3</sup>HANCER (Perkin Elmer), blots were exposed for autoradiography. **d** RNAs extracted from cells transfected with the indicated siRNAs, hybridized with a probe directed against the 5'-ETS (5'-External Transcribed Spacer) of the rRNA gene. Arrows indicate the 47S pre-rRNA transcript and the 34S precursor of the 18S rRNA. **e** Profiles of the ploidy of propidium iodide stained A549 cells transfected for 24 hrs with the indicated siRNAs. For each sample are shown the percent of cells in the G1 (left peak) and G2 (right peak) phase of the cell cycle.

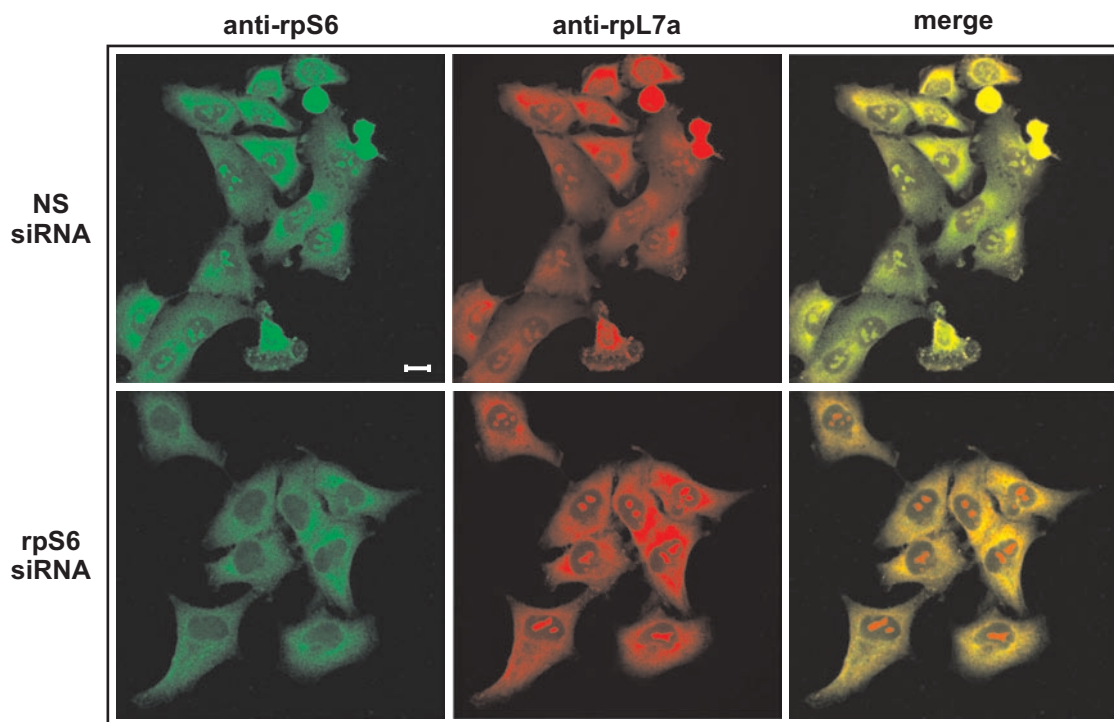

**Figure S2** Depletion of rpS6 does not alter recruitment of the large ribosomal subunit protein rpL7a. A549 cells treated with either NS siRNA or rpS6 siRNA2 for 48 hrs were fixed and co-stained

with anti-rpS6 and anti-rpL7a antibodies and analyzed by confocal microscopy with a Plan-Apochromat 63X/1.4 Oil Dic objective (Zeiss, see Methods). The bar corresponds to a size of 10  $\mu\text{m}$ .

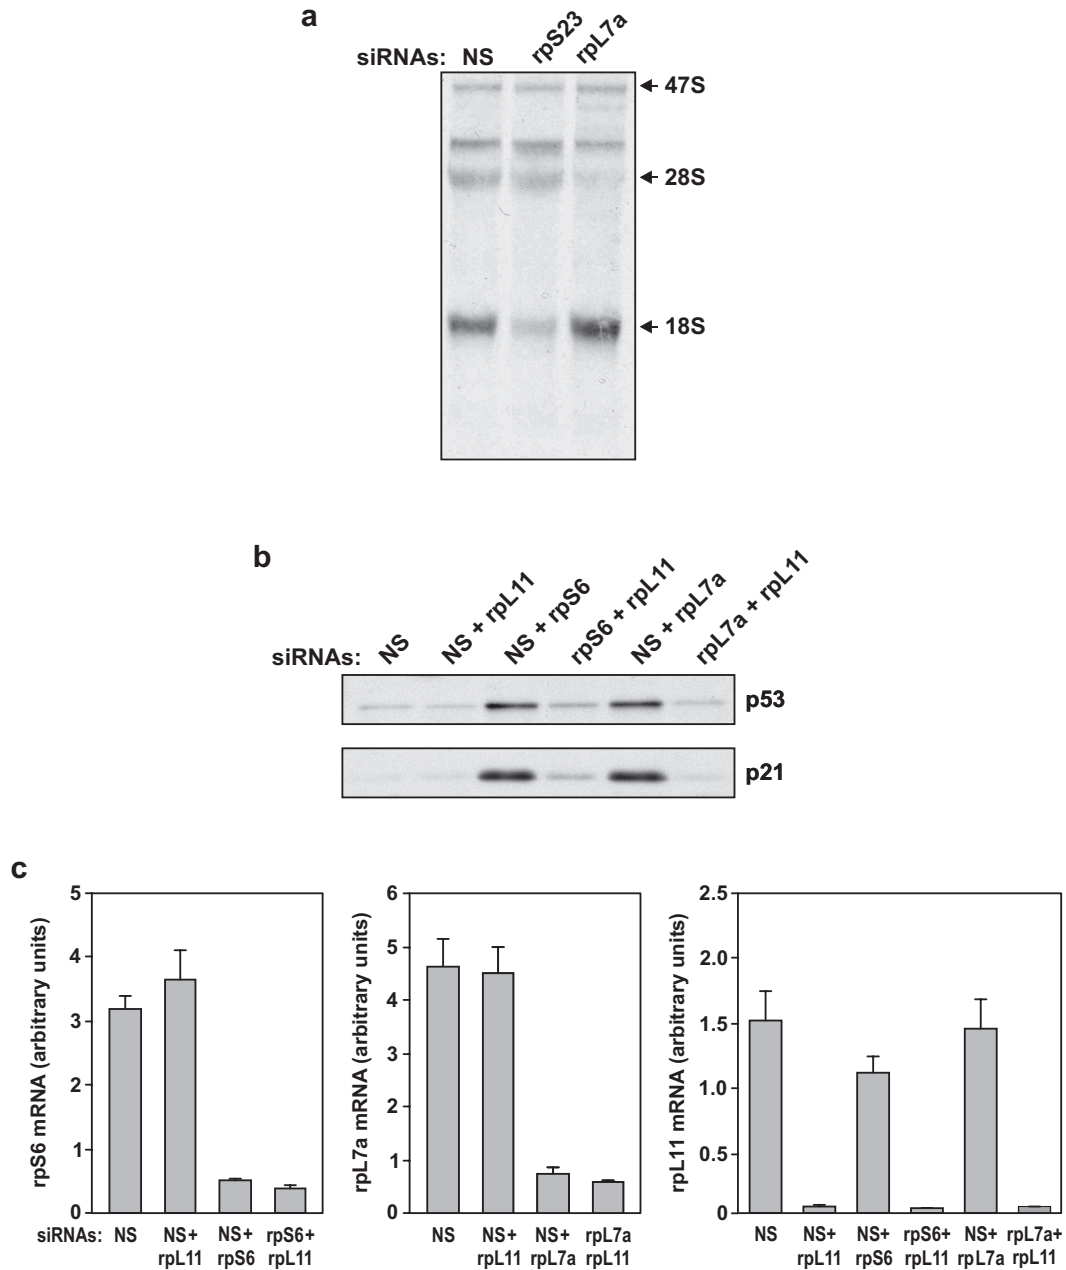

**Figure S3 a** Inhibition of ribosome biogenesis and rpl11-dependent upregulation of p53 in response to depletion of ribosomal proteins. Autoradiogram of a northern blot showing  $^3\text{H}$ -labelled RNA extracted from A549 cells transfected for 24 hrs with the indicated siRNAs and subjected to a pulse-chase with  $^3\text{H}$ -uridine as described for Suppl. Fig. 1c. **b**) Analysis of the expression of the p53 and p21 proteins in cells transfected with the indicated

siRNAs. The target sequence of the rpl11 siRNA used for this experiment is: 5'-GCGGGAGTATGAGTTAAGAAA-3'. **c**) Total RNA extracted from the indicated transfections performed in parallel to those of panel **b**, were used to measure the levels of the rpS6, rpL7a and rpL11 mRNAs by q-PCR. Each bar represents the mean  $\pm$  SEM of the ratio of the indicated mRNA to that of  $\beta$ -actin mRNA, as calculated from three independent transfection experiments.

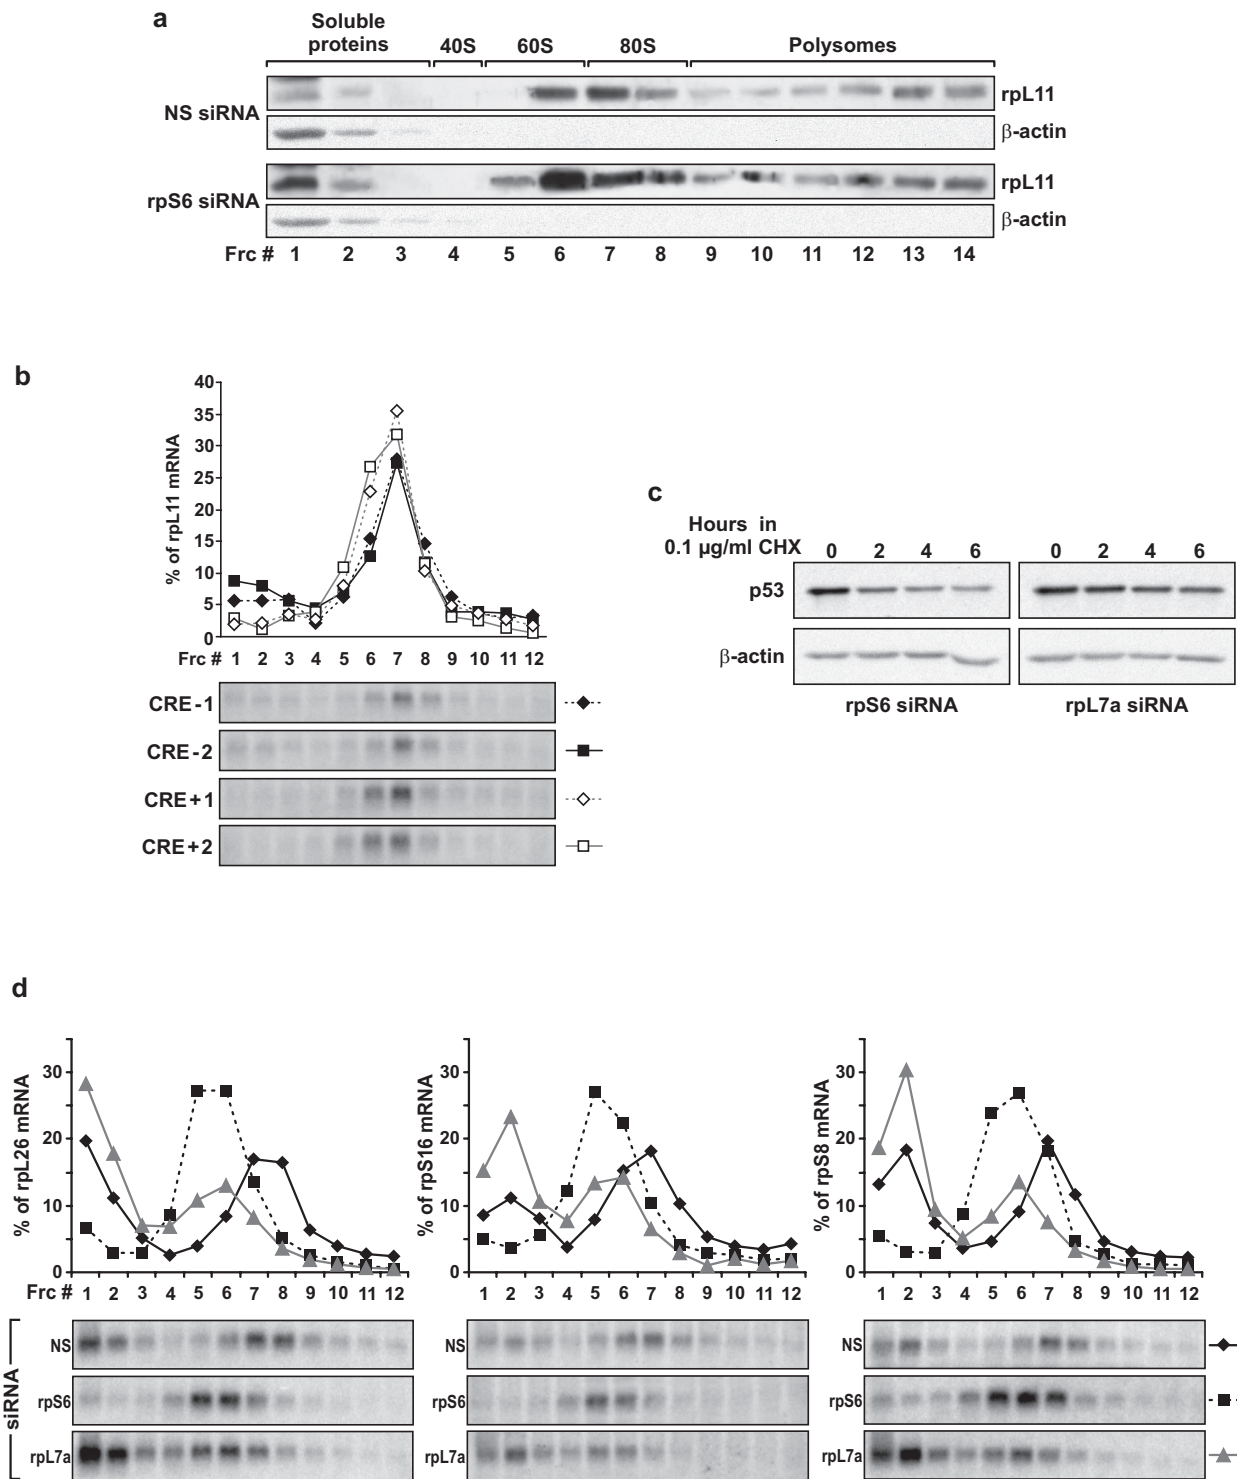

**Figure S4** Impairment of 40S ribosome biogenesis results in translational upregulation of mRNAs encoding ribosomal proteins. **a)** Extracts of A549 cells transfected for 30 hrs with either NS or rpS6 siRNA2 were resolved on sucrose gradients, fractionated, and the fractions analyzed by western blot analysis for the presence of rpL11 and β-actin. **b)** Northern blot analysis of the distribution of the rpL11 mRNA on polysomes in the livers of *rpS6<sup>fl/fl</sup>MxCre<sup>-</sup>* (CRE-1 and CRE-2) and *rpS6<sup>fl/fl</sup>MxCre<sup>+</sup>* (CRE+1 and

CRE+2) mice at 30 hrs following partial hepatectomy. **c)** Western blots showing the levels of p53 and β-actin proteins in cells transfected for 24 hours with either rpS6 or rpL7a siRNAs and treated for the indicated times with 0.1 μg/ml of cyclohexamide. **d)** Northern blot analysis of the distribution of the rpL26 (left panel), rpS16 (middle panel) and rpS8 (right panel) mRNAs on polysomes from cells transfected with NS, rpS6 or rpL7a siRNAs for 24 hours.

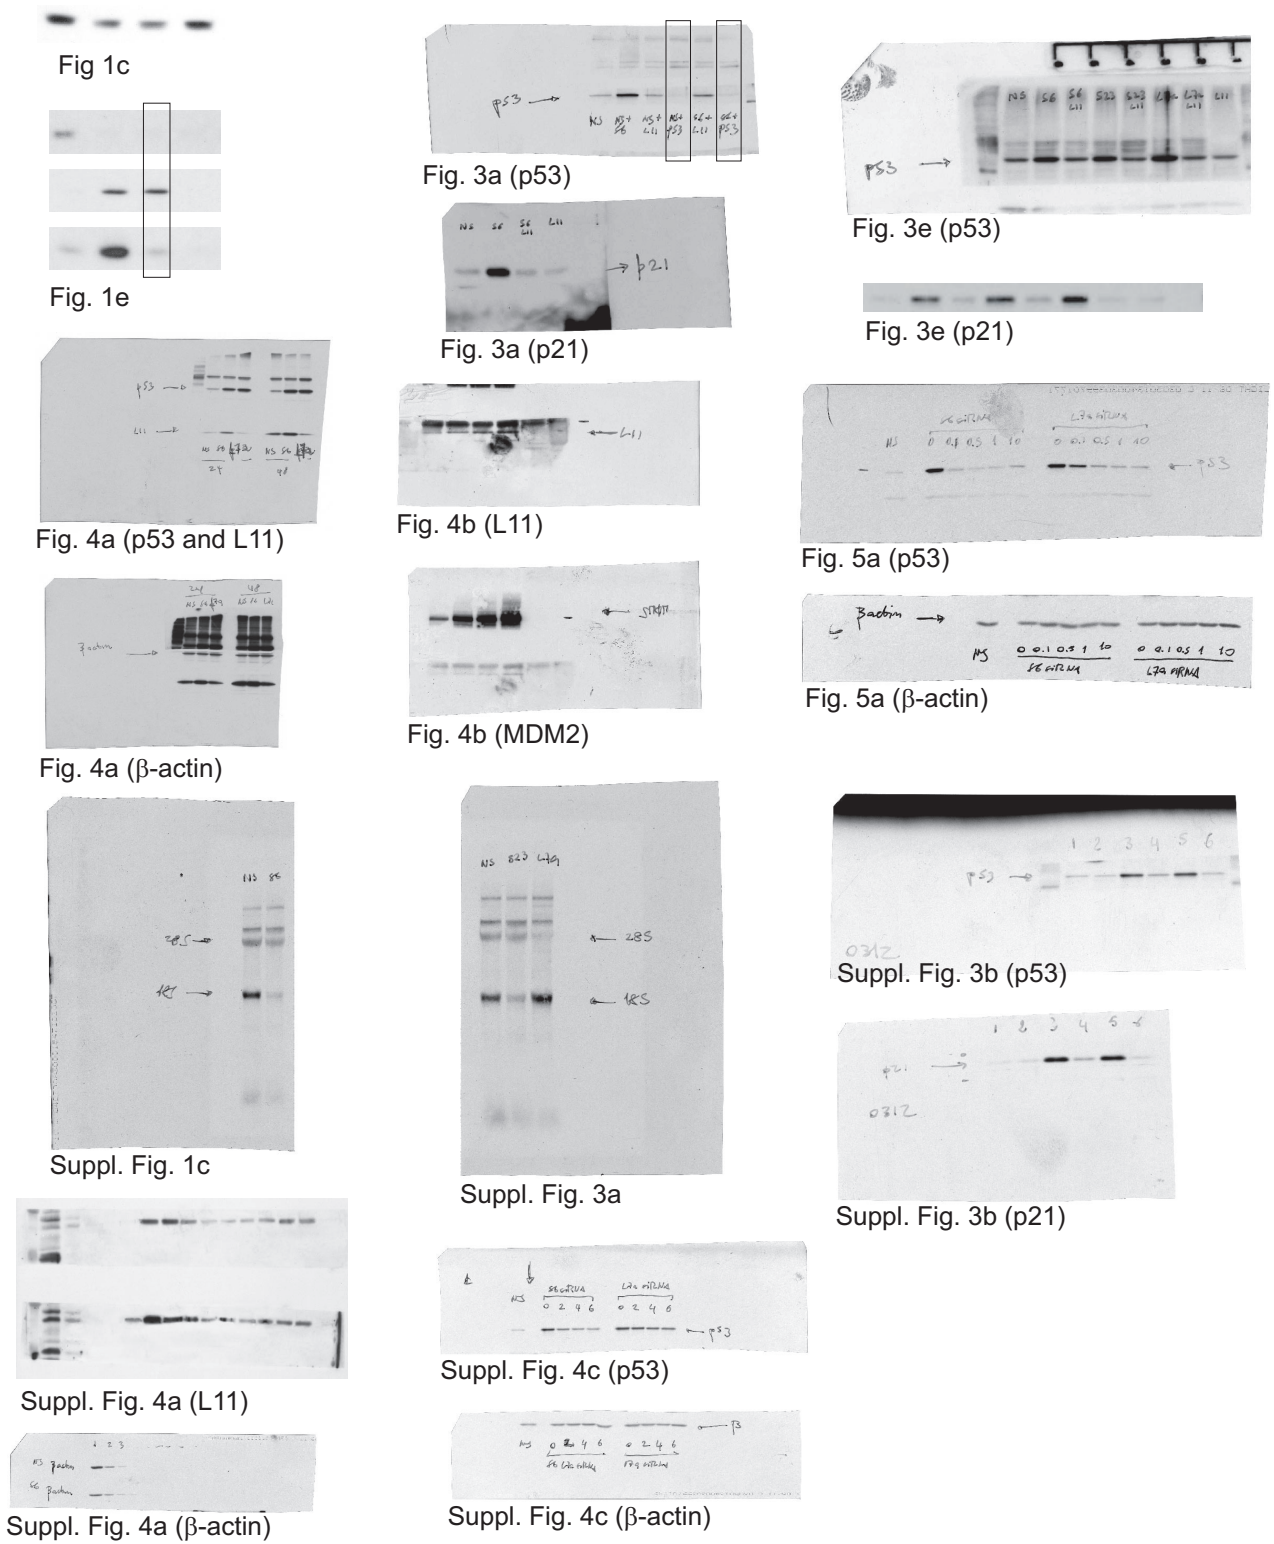

Figure S5 Scans of the immunoblots shown in each figure. The rectangles indicate parts of the experiments that have been omitted from the corresponding figures.



# SUPPLEMENTARY INFORMATION

**Table S1** List of the genes differentially expressed in the livers of *rpS6<sup>fl/fl</sup>MxCre<sup>+</sup>* vs. *rpS6<sup>fl/fl</sup>MxCre<sup>-</sup>* mice following partial hepatectomy. List of genes whose mRNA levels are either increased (positive values in fold change, white background) or decreased (negative values in fold change, yellow background) in the liver of *rpS6<sup>fl/fl</sup>MxCre<sup>+</sup>* vs. *rpS6<sup>fl/fl</sup>MxCre<sup>-</sup>* mice at 0, 20, 30 and 40 hrs after partial hepatectomy, as measured by hybridization of DNA microarrays. For the genes upregulated in the liver of *rpS6<sup>fl/fl</sup>MxCre<sup>+</sup>* mice the fold change is the ratio between the mean of the normalized expression of triplicate samples of *rpS6<sup>fl/fl</sup>MxCre<sup>+</sup>* and that of *rpS6<sup>fl/fl</sup>MxCre<sup>-</sup>* mice. Conversely for the genes downregulated in *rpS6<sup>fl/fl</sup>MxCre<sup>+</sup>* mice the fold change is the negative of the reciprocal of the ratio between the mean of the normalized expression of triplicate samples of *rpS6<sup>fl/fl</sup>MxCre<sup>+</sup>* and that of *rpS6<sup>fl/fl</sup>MxCre<sup>-</sup>* mice. Known gene targets of transcription factors of the E2F family that are found downregulated in the livers of *rpS6<sup>fl/fl</sup>MxCre<sup>+</sup>* vs. *rpS6<sup>fl/fl</sup>MxCre<sup>-</sup>* mice at 40 hrs after surgery, are highlighted in green.

| Time (h) | ProbeSet    | Gene Symbol    | Description                                                                               | Fold Change | Change pValue |
|----------|-------------|----------------|-------------------------------------------------------------------------------------------|-------------|---------------|
| 0        | 94881_at    | Cdkn1a         | Cyclin-dependent kinase inhibitor 1A (P21)                                                | 3.87        | 1.02E-03      |
| 0        | 98067_at    | Cdkn1a         | Cyclin-dependent kinase inhibitor 1A (P21)                                                | 1.91        | 3.26E-03      |
| 0        | 93536_at    | Bax            | Bcl2-associated X protein                                                                 | 1.86        | 7.47E-03      |
| 0        | 98056_at    | Phlda3         | pleckstrin homology-like domain, family A, member 3                                       | 1.83        | 3.22E-03      |
| 0        | 100050_at   | Idb1           | Inhibitor of DNA binding 1                                                                | 1.81        | 2.19E-03      |
| 0        | 101587_at   | Ephx1          | Epoxide hydrolase 1 microsomal                                                            | 1.81        | 1.38E-03      |
| 0        | 97497_at    | Notch1         | Notch gene homolog 1 (Drosophila)                                                         | 1.69        | 1.88E-03      |
| 0        | 98110_at    | Mdm2           | Transformed mouse 3T3 cell double minute 2                                                | 1.57        | 1.07E-03      |
| 0        | 160265_at   | Eif5           | Eukaryotic translation initiation factor 5                                                | 1.5         | 9.61E-03      |
| 0        | 104248_at   | Ssr3           | Signal sequence receptor gamma                                                            | -1.5        | 4.80E-03      |
| 0        | 94939_at    | Cd53           | CD53 antigen                                                                              | -1.5        | 6.59E-03      |
| 0        | 96426_at    | Tmsb4x         | Thymosin beta 4 X-linked                                                                  | -1.5        | 2.75E-03      |
| 0        | 100397_at   | Tyrobp         | TYRO protein tyrosine kinase binding protein                                              | -1.51       | 4.56E-03      |
| 0        | 104249_g_at | Ssr3           | Signal sequence receptor gamma                                                            | -1.69       | 1.05E-03      |
| 0        | 96020_at    | C1qb           | Complement component 1 q subcomponent beta polypeptide                                    | -1.73       | 1.12E-03      |
| 0        | 103284_at   | Cyp8b1         | Cytochrome P450 family 8 subfamily b polypeptide 1                                        | -1.74       | 6.68E-03      |
| 0        | 96662_at    | Ppap2b         | Transcribed locus                                                                         | -1.83       | 8.48E-03      |
| 0        | 93445_at    | Cd5l           | CD5 antigen-like                                                                          | -2.45       | 9.98E-04      |
| 0        | 161968_f_at | Ccr5           | Chemokine (C-C motif) receptor 5                                                          | -2.52       | 6.22E-03      |
| 0        | 93987_f_at  | 3110001N18Rik  | ribosomal protein L22 like                                                                | -3.23       | 5.74E-04      |
| 0        | 101577_at   | Rps6           | Ribosomal Protein S6                                                                      | -21.43      | 6.79E-05      |
| 20       | 98056_at    | Phlda3         | Pleckstrin homology-like domain                                                           | 2.29        | 9.59E-03      |
| 20       | 99148_at    | Fh1            | Fumarate hydratase 1                                                                      | 2.02        | 1.28E-04      |
| 20       | 104072_at   | Apcs           | Serum amyloid P-component                                                                 | 1.92        | 3.06E-03      |
| 20       | 102013_at   | Rdh6           | Retinol dehydrogenase 16                                                                  | 1.69        | 1.96E-03      |
| 20       | 98467_at    | Itih4          | Inter alpha-trypsin inhibitor heavy chain 4                                               | 1.69        | 7.16E-04      |
| 20       | 103334_at   | Crcp           | Calcitonin gene-related peptide-receptor component protein                                | 1.68        | 5.02E-04      |
| 20       | 96058_s_at  | Aldh2          | Aldehyde dehydrogenase 2 mitochondrial                                                    | 1.65        | 2.82E-03      |
| 20       | 93536_at    | Bax            | Bcl2-associated X protein                                                                 | 1.58        | 1.36E-03      |
| 20       | 98915_at    | Rnf149         | Ring finger protein 149                                                                   | 1.52        | 4.77E-03      |
| 20       | 102879_s_at | Fcgr1          | Fc receptor IgG high affinity I                                                           | -1.5        | 1.54E-03      |
| 20       | 94425_at    | Ly86           | Lymphocyte antigen 86                                                                     | -1.51       | 9.34E-04      |
| 20       | 92217_s_at  | Gp49b          | Leukocyte immunoglobulin-like receptor subfamily B member 4                               | -1.52       | 5.08E-03      |
| 20       | 104093_at   | Lsp1           | Lymphocyte specific 1                                                                     | -1.53       | 6.24E-03      |
| 20       | 100059_at   | Cyba           | Cytochrome b-245 alpha polypeptide                                                        | -1.54       | 6.67E-03      |
| 20       | 97013_f_at  | Cyba           | Cytochrome b-245 alpha polypeptide                                                        | -1.54       | 8.20E-03      |
| 20       | 92558_at    | Vcam1          | Vascular cell adhesion molecule 1                                                         | -1.56       | 1.37E-03      |
| 20       | 104354_at   | Csf1r          | Colony stimulating factor 1 receptor                                                      | -1.57       | 3.69E-03      |
| 20       | 102807_at   | 9230112O05Rik  | Prune homolog (Drosophila)                                                                | -1.64       | 3.80E-03      |
| 20       | 92858_at    | Slpi           | Secretory leukocyte peptidase inhibitor                                                   | -1.73       | 7.17E-03      |
| 20       | 103016_s_at | Cd68           | CD68 antigen                                                                              | -1.79       | 5.66E-03      |
| 20       | 101468_at   | Pfc            | Complement factor properdin                                                               | -1.92       | 2.27E-04      |
| 20       | 100397_at   | Tyrobp         | TYRO protein tyrosine kinase binding protein                                              | -2.19       | 6.12E-03      |
| 20       | 102974_at   | Marco          | Macrophage receptor with collagenous structure                                            | -2.24       | 6.89E-03      |
| 20       | 92223_at    | C1qg           | Complement component 1 q subcomponent C chain                                             | -2.28       | 1.46E-04      |
| 20       | 98562_at    | C1qa           | Complement component 1 q subcomponent alpha polypeptide                                   | -2.28       | 2.32E-04      |
| 20       | 96020_at    | C1qb           | Complement component 1 q subcomponent beta polypeptide                                    | -2.33       | 1.39E-03      |
| 20       | 92222_f_at  | H2-Q1          | Histocompatibility 2 Q region locus 1                                                     | -2.67       | 2.12E-05      |
| 20       | 101577_at   | Rps6           | Ribosomal Protein S6                                                                      | -17.79      | 5.40E-04      |
| 30       | 94881_at    | Cdkn1a         | Cyclin-dependent kinase inhibitor 1A (P21)                                                | 5.12        | 5.22E-03      |
| 30       | 95518_at    | 1810015C04Rik  | RIKEN cDNA 1810015C04 gene                                                                | 4.66        | 3.74E-03      |
| 30       | 160092_at   | Ifrd1          | Interferon-related developmental regulator 1                                              | 4.54        | 7.05E-04      |
| 30       | 92796_at    | Akp2           | Alkaline phosphatase liver/bone/kidney                                                    | 3.77        | 3.47E-04      |
| 30       | 102701_at   | Cyp2b20        | Cytochrome P450 family 2 subfamily b polypeptide 10                                       | 3.66        | 3.77E-03      |
| 30       | 102847_s_at | Cyp2a4         | Cytochrome P450 family 2 subfamily a polypeptide 4                                        | 3.42        | 5.66E-03      |
| 30       | 98596_s_at  | Siat9          | ST3 beta-galactoside alpha-23-sialyltransferase 5                                         | 3.28        | 5.38E-03      |
| 30       | 102699_at   | Mx2            | Myxovirus (influenza virus) resistance 2                                                  | 3.24        | 5.29E-04      |
| 30       | 160265_at   | Eif5           | Eukaryotic translation initiation factor 5                                                | 2.39        | 4.03E-04      |
| 30       | 97317_at    | Enpp2          | Ectonucleotide pyrophosphatase/phosphodiesterase 2                                        | 2.39        | 7.46E-03      |
| 30       | 96348_at    | 0610039C21Rik  | Patatin-like phospholipase domain containing 2                                            | 2.27        | 1.78E-03      |
| 30       | 97965_at    | Pla2g6         | Phospholipase A2 group VI                                                                 | 2.22        | 3.81E-03      |
| 30       | 98973_at    | 2610318G08Rik  | WD repeat domain 43                                                                       | 2.15        | 3.85E-03      |
| 30       | 99133_at    | Slc3a2         | Solute carrier family 3 (activators of dibasic and neutral amino acid transport) member 2 | 2.14        | 1.12E-03      |
| 30       | 101088_f_at | Cnbp1          | Cellular nucleic acid binding protein                                                     | 2.04        | 7.79E-03      |
| 30       | 98608_at    | Etf1           | Eukaryotic translation termination factor 1                                               | 2.02        | 4.50E-03      |
| 30       | 101582_at   | BC003262       | Guanine nucleotide binding protein-like 2 (nucleolar)                                     | 1.97        | 1.06E-03      |
| 30       | 92739_at    | Ivl            | Involucrin                                                                                | 1.94        | 2.31E-03      |
| 30       | 100535_at   | E130105L1 1Rik | Eukaryotic translation initiation factor 4 gamma 2                                        | 1.93        | 7.45E-03      |
| 30       | 102315_at   | Tex292         | Cirrhosis autosomal recessive 1A (human)                                                  | 1.93        | 6.56E-03      |
| 30       | 95409_at    | 1110019J04Rik  | RIKEN cDNA 1110019J04 gene                                                                | 1.93        | 2.10E-03      |
| 30       | 92569_f_at  | Nol5           | Nucleolar protein 5                                                                       | 1.91        | 9.97E-03      |
| 30       | 101889_s_at | Rora           | RAR-related orphan receptor alpha                                                         | 1.89        | 5.13E-03      |
| 30       | 93782_at    | Rnf4           | Ring finger protein 4                                                                     | 1.89        | 8.22E-03      |
| 30       | 93741_at    | C87860         | NMD3 homolog (S. cerevisiae)                                                              | 1.87        | 1.07E-03      |
| 30       | 160266_r_at | 1110064N10Rik  | Brix domain containing 2                                                                  | 1.85        | 3.80E-03      |
| 30       | 160283_at   | 2410005K20Rik  | Ribosomal L1 domain containing 1                                                          | 1.85        | 3.24E-03      |
| 30       | 100554_at   | Pdlim1         | PDZ and LIM domain 1 (elfin)                                                              | 1.82        | 1.45E-04      |
| 30       | 160676_at   | 1810012N18Rik  | RIKEN cDNA 1810012N18 gene                                                                | 1.8         | 5.76E-03      |
| 30       | 99849_at    | ---            | ---                                                                                       | 1.79        | 3.81E-03      |
| 30       | 102114_f_at | Angptl4        | Angiopietin-like 4                                                                        | 1.77        | 2.55E-03      |
| 30       | 104666_at   | E430039K05Rik  | zinc finger protein 653                                                                   | 1.74        | 7.24E-03      |
| 30       | 160384_at   | Bat1a          | HLA-B-associated transcript 1A                                                            | 1.74        | 2.28E-03      |
| 30       | 97824_at    | Nola2          | Nucleolar protein family A member 2                                                       | 1.73        | 9.54E-03      |
| 30       | 98081_at    | Rpo1-3         | RNA polymerase 1-3                                                                        | 1.72        | 2.34E-03      |

|    |             |               |                                                                                                              |       |            |
|----|-------------|---------------|--------------------------------------------------------------------------------------------------------------|-------|------------|
| 30 | 102385_at   | 2610318G08Rik | WD repeat domain 43                                                                                          | 1.7   | 5.30E-05   |
| 30 | 103010_at   | 2610005L07Rik | RIKEN cDNA 2610005L07 gene                                                                                   | 1.7   | 3.48E-03   |
| 30 | 160451_at   | Etf1          | Eukaryotic translation termination factor 1                                                                  | 1.67  | 8.86E-04   |
| 30 | 103389_at   | Aass          | Aminoadipate-semialdehyde synthase                                                                           | 1.64  | 6.20E-03   |
| 30 | 103753_at   | Zzz3          | zinc finger, ZZ domain containing 3                                                                          | 1.64  | 9.31E-03   |
| 30 | 94502_at    | D13Wsu50e     | Mediator of RNA polymerase II transcription subunit 10 homolog (NUT2 <i>S. cerevisiae</i> )                  | 1.64  | 2.93E-04   |
| 30 | 97819_at    | Gsto1         | glutathione S-transferase omega 1                                                                            | 1.64  | 9.26E-03   |
| 30 | 101587_at   | Ephx1         | Epoxide hydrolase 1 microsomal                                                                               | 1.62  | 6.38E-03   |
| 30 | 96326_at    | Ta t          | Tyrosine aminotransferase                                                                                    | 1.62  | 1.67E-03   |
| 30 | 102091_f_at | ---           | ---                                                                                                          | 1.59  | 2.45E-03   |
| 30 | 92659_at    | Rapgef4       | Rap guanine nucleotide exchange factor (GEF) 4                                                               | 1.59  | 2.96E-03   |
| 30 | 99019_at    | Por           | P450 (cytochrome) oxidoreductase                                                                             | 1.58  | 4.73E-03   |
| 30 | 100985_at   | Siah1a        | Seven in absentia 1A                                                                                         | 1.57  | 3.43E-03   |
| 30 | 104560_at   | Slc25a28      | Solute carrier family 25 member 28                                                                           | 1.56  | 3.32E-03   |
| 30 | 101964_at   | Tkt           | Transketolase                                                                                                | 1.55  | 2.98E-03   |
| 30 | 103907_at   | Nedd4l        | Neural precursor cell expressed developmentally down-regulated gene 4-like                                   | 1.53  | 7.49E-03   |
| 30 | 98950_at    | Rragc         | Ras-related GTP binding C                                                                                    | 1.53  | 8.69E-03   |
| 30 | 160605_s_at | Usp38         | Ubiquitin specific peptidase 38                                                                              | 1.52  | 6.15E-03   |
| 30 | 93619_at    | Per1          | Period homolog 1 ( <i>Drosophila</i> )                                                                       | 1.52  | 2.57E-03   |
| 30 | 99180_at    | Gtpbp4        | GTP binding protein 4                                                                                        | 1.52  | 4.10E-03   |
| 30 | 102663_at   | Plaur         | Plasminogen activator urokinase receptor                                                                     | 1.5   | 1.90E-03   |
| 30 | 103498_at   | Gcgr          | Glucagon receptor                                                                                            | -1.51 | 1.95E-03   |
| 30 | 93485_at    | Ptprd         | Protein tyrosine phosphatase receptor type D                                                                 | -1.52 | 1.65E-03   |
| 30 | 93550_at    | Csrp2         | Cysteine and glycine-rich protein 2                                                                          | -1.53 | 6.37E-03   |
| 30 | 95709_at    | Vkorc1        | Vitamin K epoxide reductase complex subunit 1                                                                | -1.54 | 8.89E-03   |
| 30 | 96172_at    | Ian1          | GTPase IMAP family member 4                                                                                  | -1.54 | 4.92E-03   |
| 30 | 93237_s_at  | Tyms-ps       | Thymidylate synthase                                                                                         | -1.55 | 4.69E-04   |
| 30 | 99056_at    | Pcbd          | Pterin 4 alpha carbinolamine dehydratase/dimerization cofactor of hepatocyte nuclear factor 1 alpha (TCF1) 1 | -1.56 | 7.16E-03   |
| 30 | 94024_at    | Ris2          | Chromatin licensing and DNA replication factor 1                                                             | -1.57 | 8.75E-03   |
| 30 | 160957_at   | D12Ert47e     | Dicer1 Dcr-1 homolog ( <i>Drosophila</i> )                                                                   | -1.58 | 1.19E-03   |
| 30 | 99469_at    | Pex6          | Peroxisomal biogenesis factor 6                                                                              | -1.58 | 4.31E-03   |
| 30 | 93437_f_at  | 4632419I22Rik | integrator complex subunit 2                                                                                 | -1.62 | 5.52E-03   |
| 30 | 100612_at   | Rrm1          | Ribonucleotide reductase M1                                                                                  | -1.63 | 0.00665121 |
| 30 | 93236_s_at  | Tyms          | Thymidylate synthetase                                                                                       | -1.63 | 4.49E-03   |
| 30 | 160203_at   | Dnajc9        | DnaJ (Hsp40) homolog subfamily C member 9                                                                    | -1.68 | 2.47E-03   |
| 30 | 98033_at    | 1100001H23Rik | RIKEN cDNA 1100001H23 gene                                                                                   | -1.68 | 8.84E-03   |
| 30 | 99963_at    | Zfp101        | Zinc finger protein 101                                                                                      | -1.69 | 6.10E-03   |
| 30 | 98076_at    | Erp29         | Endoplasmic reticulum protein 29                                                                             | -1.71 | 3.74E-03   |
| 30 | 102797_at   | Dhrs3         | Dehydrogenase/reductase (SDR family) member 3                                                                | -1.73 | 3.30E-05   |
| 30 | 103695_f_at | C330007P06Rik | RIKEN cDNA C330007P06 gene                                                                                   | -1.74 | 8.23E-03   |
| 30 | 160197_at   | Pycrl         | Pyrraline-5-carboxylate reductase-like                                                                       | -1.75 | 6.18E-03   |
| 30 | 96336_at    | Gatm          | Glycine amidinotransferase (L-arginine:glycine amidinotransferase)                                           | -1.76 | 3.82E-03   |
| 30 | 100737_at   | Onecut1       | One cut domain family member 1                                                                               | -1.77 | 3.46E-03   |
| 30 | 100916_at   | Slc22a1       | Solute carrier family 22 (organic cation transporter) member 1                                               | -1.77 | 3.24E-04   |
| 30 | 92697_at    | Foxa1         | Forkhead box A1                                                                                              | -1.77 | 6.51E-03   |
| 30 | 99632_at    | Mad2l1        | MAD2 (mitotic arrest deficient homolog)-like 1 (yeast)                                                       | -1.77 | 1.00E-03   |
| 30 | 102354_at   | Tcf19         | Transcription factor 19                                                                                      | -1.78 | 7.05E-03   |
| 30 | 160759_at   | Rfc2          | Replication factor C (activator 1) 2                                                                         | -1.78 | 2.97E-03   |
| 30 | 161787_f_at | Ris2          | Chromatin licensing and DNA replication factor 1                                                             | -1.78 | 1.39E-03   |
| 30 | 97309_at    | Stt13         | Suppression of tumorigenicity 13                                                                             | -1.79 | 9.71E-03   |
| 30 | 103071_at   | 2810429C13Rik | Topoisomerase (DNA) II beta binding protein                                                                  | -1.8  | 7.55E-05   |
| 30 | 104476_at   | Rbl1          | Retinoblastoma-like 1 (p107)                                                                                 | -1.8  | 7.14E-03   |
| 30 | 93843_at    | Dhrs1         | Dehydrogenase/reductase (SDR family) member 1                                                                | -1.82 | 2.29E-03   |
| 30 | 103207_at   | Pola1         | Polymerase (DNA directed) alpha 1                                                                            | -1.86 | 5.96E-04   |
| 30 | 101962_at   | 2610007K22Rik | DEAD (Asp-Glu-Ala-Asp) box polypeptide 17                                                                    | -1.88 | 9.52E-03   |
| 30 | 103418_at   | Rfc4          | Replication factor C (activator 1) 4                                                                         | -1.88 | 7.67E-04   |
| 30 | 94393_r_at  | Elov12        | Elongation of very long chain fatty acids (FEN1/Elo2/SUR4/Elo3 yeast)-like 2                                 | -1.88 | 1.14E-03   |
| 30 | 97866_at    | 2510049I19Rik | RIKEN cDNA 2510049I19 gene                                                                                   | -1.88 | 3.90E-03   |
| 30 | 100062_at   | Mcm3          | Minichromosome maintenance deficient 3 ( <i>S. cerevisiae</i> )                                              | -1.9  | 6.86E-03   |
| 30 | 101515_at   | Acox1         | Acyl-Coenzyme A oxidase 1 palmitoyl                                                                          | -1.93 | 8.38E-03   |
| 30 | 96122_at    | 2310016A09Rik | Carboxymethylenebutenolidase-like ( <i>Pseudomonas</i> )                                                     | -1.93 | 9.00E-03   |
| 30 | 96710_at    | H2av          | H2A histone family member V                                                                                  | -1.93 | 9.34E-03   |
| 30 | 92590_at    | Hmgcs2        | 3-hydroxy-3-methylglutaryl-Coenzyme A synthase 2                                                             | -1.96 | 3.29E-03   |
| 30 | 96086_at    | 1110031B06Rik | RIKEN cDNA 1110031B06 gene                                                                                   | -1.96 | 9.04E-03   |
| 30 | 96792_at    | Apop          | Apolipoprotein B                                                                                             | -1.97 | 5.88E-03   |
| 30 | 98071_f_at  | Dck           | Deoxycytidine kinase                                                                                         | -1.97 | 4.56E-03   |
| 30 | 103036_at   | G22p1         | X-ray repair complementing defective repair in Chinese hamster cells 6                                       | -1.98 | 7.99E-03   |
| 30 | 160371_at   | Arl6ip1       | ADP-ribosylation factor-like 6 interacting protein 1                                                         | -1.98 | 4.39E-03   |
| 30 | 96925_at    | 2810024B22Rik | Glycosyltransferase 25 domain containing 1                                                                   | -1.98 | 2.82E-04   |
| 30 | 98594_at    | 1190002N15Rik | RIKEN cDNA 1190002N15 gene                                                                                   | -1.98 | 2.01E-03   |
| 30 | 101065_at   | Pcna          | Proliferating cell nuclear antigen                                                                           | -2.03 | 3.83E-03   |
| 30 | 160104_at   | Hsd3b7        | Hydroxy-delta-5-steroid dehydrogenase 3 beta- and steroid delta-isomerase 7                                  | -2.04 | 1.39E-03   |
| 30 | 100494_at   | Fgf1          | Fibroblast growth factor 1                                                                                   | -2.06 | 4.95E-03   |
| 30 | 101877_at   | Slc31a1       | Solute carrier family 31 member 1                                                                            | -2.09 | 5.37E-03   |
| 30 | 98587_at    | Nap111        | Nucleosome assembly protein 1-like 1                                                                         | -2.1  | 6.64E-03   |
| 30 | 93041_at    | Mcm4          | Minichromosome maintenance deficient 4 homolog ( <i>S. cerevisiae</i> )                                      | -2.24 | 9.41E-04   |
| 30 | 100128_at   | Cdc2a         | Cell division cycle 2 homolog A ( <i>S. pombe</i> )                                                          | -2.25 | 4.86E-03   |
| 30 | 103794_i_at | Timd2         | T-cell immunoglobulin and mucin domain containing 2                                                          | -2.26 | 5.14E-03   |
| 30 | 103697_at   | AW061234      | Transcribed locus                                                                                            | -2.27 | 7.93E-03   |
| 30 | 160496_s_at | Mcm3          | Minichromosome maintenance deficient 3 ( <i>S. cerevisiae</i> )                                              | -2.27 | 2.59E-03   |
| 30 | 97411_at    | Ect2          | Ect2 oncogene                                                                                                | -2.29 | 1.42E-03   |
| 30 | 101002_at   | Oazin         | Antizyme inhibitor 1                                                                                         | -2.32 | 7.79E-03   |
| 30 | 93728_at    | Tgfb1i4       | TSC22 domain family member 1                                                                                 | -2.39 | 7.02E-03   |
| 30 | 93987_f_at  | 3110001N18Rik | ribosomal protein L22 like 1                                                                                 | -2.45 | 1.35E-03   |
| 30 | 92808_f_at  | Fkbp4         | FK506 binding protein 4                                                                                      | -2.51 | 3.83E-03   |
| 30 | 97987_at    | Igfals        | Insulin-like growth factor binding protein acid labile subunit                                               | -2.65 | 2.83E-03   |
| 30 | 104328_at   | Aqp9          | Aquaporin 9                                                                                                  | -2.89 | 7.95E-03   |
| 30 | 93445_at    | Cd5l          | CD5 antigen-like                                                                                             | -3.02 | 9.83E-03   |
| 30 | 94797_at    | Slc26a1       | solute carrier family 26 (sulfate transporter), member 1                                                     | -3.3  | 8.24E-03   |
| 30 | 96594_at    | Hspa4         | Heat shock protein 4                                                                                         | -3.58 | 2.00E-03   |
| 30 | 103534_at   | Hbb-b1        | Hemoglobin beta adult major chain                                                                            | -5.8  | 7.23E-03   |
| 30 | 101577_at   | Rps6          | Ribosomal Protein S6                                                                                         | -22.5 | 6.71E-05   |

# SUPPLEMENTARY INFORMATION

| Time (h) | ProbeSet    | Gene Symbol   | Description                                                                      | Fold Change | Change pValue |
|----------|-------------|---------------|----------------------------------------------------------------------------------|-------------|---------------|
| 40       | 160092_at   | Ifrd1         | Interferon-related developmental regulator 1                                     | 4.69        | 1.95E-03      |
| 40       | 160265_at   | Eif5          | Eukaryotic translation initiation factor 5                                       | 3.42        | 6.66E-05      |
| 40       | 96156_at    | 1110008H02Rik | Small nucleolar RNA host gene (non-protein coding) 6                             | 2.17        | 5.70E-03      |
| 40       | 104745_at   | Arl6ip2       | ADP-ribosylation factor-like 6 interacting protein 2                             | 2.06        | 2.74E-04      |
| 40       | 97205_at    | Eif3s1        | eukaryotic translation initiation factor 3, subunit J                            | 2.01        | 4.35E-03      |
| 40       | 98056_at    | Phlda3        | Pleckstrin homology-like domain                                                  | 2.01        | 1.04E-03      |
| 40       | 100535_at   | E130105L11Rik | Eukaryotic translation initiation factor 4 gamma 2                               | 2           | 7.55E-03      |
| 40       | 104601_at   | Thbd          | Thrombomodulin                                                                   | 1.97        | 5.90E-03      |
| 40       | 104588_at   | 1810073K19Rik | hepcidin antimicrobial peptide 2                                                 | 1.91        | 4.85E-06      |
| 40       | 95721_at    | Mapkapk2      | MAP kinase-activated protein kinase 2                                            | 1.87        | 2.45E-03      |
| 40       | 101890_f_at | Zrf2          | DnaJ (Hsp40) homolog subfamily C member 2                                        | 1.86        | 5.29E-03      |
| 40       | 98545_at    | Bcap37        | Prohibitin 2                                                                     | 1.86        | 4.87E-03      |
| 40       | 160090_f_at | Aldo1         | Aldolase 1 A isoform                                                             | 1.83        | 1.64E-03      |
| 40       | 160310_at   | D19Bwg1357e   | Pumilio domain-containing protein KIAA0020.                                      | 1.82        | 7.85E-03      |
| 40       | 95409_at    | 1110019J04Rik | RIKEN cDNA 1110019J04 gene                                                       | 1.81        | 4.33E-03      |
| 40       | 98102_at    | Pdha1         | Pyruvate dehydrogenase E1 alpha 1                                                | 1.8         | 5.28E-04      |
| 40       | 95034_f_at  | Ipo4          | Importin 4                                                                       | 1.78        | 9.18E-03      |
| 40       | 100720_at   | Pabpc1        | poly A binding protein, cytoplasmic 1                                            | 1.75        | 2.69E-04      |
| 40       | 103808_at   | Golga5        | Golgi autoantigen golgin subfamily a 5                                           | 1.72        | 4.54E-03      |
| 40       | 93752_at    | Iars          | Isoleucine-tRNA synthetase                                                       | 1.71        | 8.03E-03      |
| 40       | 99019_at    | Por           | P450 (cytochrome) oxidoreductase                                                 | 1.7         | 4.51E-03      |
| 40       | 101093_at   | Col4a1        | Collagen type IV alpha 1                                                         | 1.69        | 7.50E-03      |
| 40       | 160279_at   | 4930588M1 Rik | deoxynucleotidyltransferase, terminal, interacting protein 2                     | 1.68        | 9.90E-03      |
| 40       | 160321_at   | Zfp216        | Zinc finger AN1-type domain 5                                                    | 1.68        | 6.40E-04      |
| 40       | 96346_at    | Cdo1          | Cysteine dioxygenase 1 cytosolic                                                 | 1.68        | 3.76E-03      |
| 40       | 97880_at    | Dlst          | Dihydrolypoamide 5-succinyltransferase (E2 component of 2-oxo-glutarate complex) | 1.66        | 1.89E-03      |
| 40       | 93342_at    | Mki67ip       | Mki67 (FHA domain) interacting nucleolar phosphoprotein                          | 1.63        | 4.00E-03      |
| 40       | 98999_at    | Adsl          | Adenylosuccinate lyase 1                                                         | 1.62        | 8.92E-03      |
| 40       | 95690_at    | 1110030L07Rik | Sorting and assembly machinery component 50 homolog (S. cerevisiae)              | 1.61        | 1.82E-03      |
| 40       | 104033_at   | Mgea6         | Meningioma expressed antigen 6 (coiled-coil proline-rich)                        | 1.6         | 8.82E-04      |
| 40       | 160585_at   | Bxdc1         | Brix domain containing 1                                                         | 1.59        | 9.92E-03      |
| 40       | 93798_at    | Atp1a1        | ATPase Na <sup>+</sup> /K <sup>+</sup> transporting alpha 1 polypeptide          | 1.59        | 2.54E-04      |
| 40       | 103345_at   | Spna2         | Spectrin alpha 2                                                                 | 1.58        | 4.03E-03      |
| 40       | 94048_at    | Cdc34         | Cell division cycle 34 homolog (S. cerevisiae)                                   | 1.58        | 4.36E-03      |
| 40       | 95378_at    | A1842396      | Expressed sequence A1842396                                                      | 1.58        | 6.78E-04      |
| 40       | 93308_s_at  | Pcx           | Pyruvate carboxylase                                                             | 1.55        | 3.54E-03      |
| 40       | 103027_at   | 1810030O07Rik | RIKEN cDNA 1810030O07 gene                                                       | 1.54        | 6.26E-04      |
| 40       | 93257_at    | Ddx1          | DEAD (Asp-Glu-Ala-Asp) box polypeptide 1                                         | 1.53        | 1.15E-03      |
| 40       | 102385_at   | 2610318G08Rik | WD repeat domain 43                                                              | 1.52        | 2.87E-03      |
| 40       | 161332_f_at | 2610036L13Rik | Cell division cycle associated 5                                                 | -1.52       | 6.29E-03      |
| 40       | 93676_at    | Rad51ap1      | RAD51 associated protein 1                                                       | -1.52       | 4.81E-03      |
| 40       | 94971_at    | Cdkn3         | Cyclin-dependent kinase inhibitor 3                                              | -1.53       | 1.17E-03      |
| 40       | 99546_at    | Fkbp2         | FK506 binding protein 2                                                          | -1.53       | 2.40E-03      |
| 40       | 104579_r_at | Actn1         | Actinin alpha 1                                                                  | -1.54       | 1.23E-03      |
| 40       | 93095_at    | Hmgb1         | High mobility group box 1                                                        | -1.54       | 9.93E-03      |
| 40       | 97903_at    | Leng5         | tRNA splicing endonuclease 34 homolog (SEN34 S. cerevisiae)                      | -1.54       | 9.22E-04      |
| 40       | 92782_at    | Tmpo          | Thymopoietin                                                                     | -1.55       | 3.23E-03      |
| 40       | 104670_at   | 1700065A05Rik | DENN/MADD domain containing 4C                                                   | -1.59       | 4.67E-03      |
| 40       | 102976_at   | Brc1          | Breast cancer 1                                                                  | -1.6        | 8.94E-03      |
| 40       | 161856_f_at | Kif20a        | Kinesin family member 20A                                                        | -1.6        | 1.26E-04      |
| 40       | 94915_at    | Ppib          | Casein kinase 1 gamma 1                                                          | -1.6        | 6.34E-03      |
| 40       | 94953_at    | Racgap1       | Rac GTPase-activating protein 1                                                  | -1.6        | 2.70E-03      |
| 40       | 98489_at    | Dlg7          | Discs large homolog 7 (Drosophila)                                               | -1.6        | 5.69E-03      |
| 40       | 102773_at   | Car8          | Carbonic anhydrase 8                                                             | -1.61       | 4.65E-03      |
| 40       | 104097_at   | Bub1          | Budding uninhibited by benzimidazoles 1 homolog (S. cerevisiae)                  | -1.61       | 1.24E-03      |
| 40       | 97560_at    | Psap          | Prosaposin                                                                       | -1.62       | 4.45E-03      |
| 40       | 101350_g_at | Plk1          | Polo-like kinase 1 (Drosophila)                                                  | -1.64       | 9.02E-03      |
| 40       | 93984_at    | Atpi          | ATPase inhibitory factor 1                                                       | -1.64       | 6.72E-04      |
| 40       | 98469_at    | Aurkb         | Aurora kinase B                                                                  | -1.65       | 3.60E-03      |
| 40       | 100343_f_at | Tuba1         | Tubulin alpha 1                                                                  | -1.68       | 1.29E-03      |
| 40       | 104578_f_at | Actn1         | Actinin alpha 1                                                                  | -1.69       | 2.38E-03      |
| 40       | 94784_at    | D030034H08    | IQ motif containing GTPase activating protein 3                                  | -1.7        | 1.23E-03      |
| 40       | 95406_at    | 1810037I17Rik | RIKEN cDNA 1810037I17 gene                                                       | -1.7        | 9.38E-03      |
| 40       | 97238_at    | Tacc3         | Transforming acidic coiled-coil containing protein 3                             | -1.7        | 1.93E-03      |
| 40       | 160069_at   | Gmnn          | Geminin                                                                          | -1.71       | 2.81E-03      |
| 40       | 93023_f_at  | Hist2h3c2     | Histone 2 H3c2                                                                   | -1.72       | 7.43E-03      |
| 40       | 97895_f_at  | Hat1          | Histone aminotransferase 1                                                       | -1.72       | 1.28E-03      |
| 40       | 101543_f_at | Tuba6         | Tubulin alpha 1C                                                                 | -1.73       | 4.19E-04      |
| 40       | 93615_at    | Pbx3          | Pre B-cell leukemia transcription factor 3                                       | -1.73       | 8.10E-03      |
| 40       | 95118_r_at  | Kif22         | Kinesin family member 22                                                         | -1.78       | 4.61E-03      |
| 40       | 93441_at    | 2700099C18Rik | NDC80 homolog, kinetochore complex component (S. cerevisiae)                     | -1.81       | 5.13E-03      |
| 40       | 94075_at    | Fabp1         | Fatty acid binding protein 1 liver                                               | -1.81       | 1.58E-03      |
| 40       | 93548_at    | Sec61b        | Sec61 beta subunit                                                               | -1.84       | 5.31E-03      |
| 40       | 104259_at   | Cbx5          | Chromobox homolog 5 (Drosophila HP1a)                                            | -1.86       | 7.36E-03      |
| 40       | 99186_at    | Ccna2         | Cyclin A2                                                                        | -1.89       | 8.42E-05      |
| 40       | 98759_f_at  | Tuba2         | Tubulin alpha 2                                                                  | -1.91       | 1.26E-03      |
| 40       | 94024_at    | Ris2          | Chromatin licensing and DNA replication factor 1                                 | -1.92       | 6.58E-04      |
| 40       | 93495_at    | Prdx4         | Peroxisiredoxin 4                                                                | -1.93       | 1.17E-03      |
| 40       | 104476_at   | Rbl1          | Retinoblastoma-like 1 (p107)                                                     | -1.94       | 1.79E-03      |
| 40       | 100944_at   | AW112010      | Expressed sequence AW112010                                                      | -1.97       | 1.94E-03      |
| 40       | 160371_at   | Arl6ip1       | ADP-ribosylation factor-like 6 interacting protein 1                             | -1.97       | 4.03E-03      |
| 40       | 160638_at   | Cdkn2c        | Cyclin-dependent kinase inhibitor 2C (p18 inhibits CDK4)                         | -1.97       | 8.78E-05      |
| 40       | 160569_at   | 2310008M10Rik | RIKEN cDNA 2310008M10 gene                                                       | -1.98       | 1.70E-04      |
| 40       | 99917_at    | Ezh2          | Enhancer of zeste homolog 2 (Drosophila)                                         | -1.99       | 9.80E-03      |
| 40       | 99926_at    | Pigr          | Polymeric immunoglobulin receptor                                                | -2          | 7.03E-03      |
| 40       | 100616_at   | Cenpa         | Centromere autoantigen A                                                         | -2.01       | 5.56E-04      |
| 40       | 96081_at    | Tk1           | Thymidine kinase 1                                                               | -2.01       | 9.78E-03      |
| 40       | 160517_at   | Lmnb1         | Lamin B1                                                                         | -2.03       | 2.91E-03      |
| 40       | 94217_f_at  | Cdca3         | Cell division cycle associated 3                                                 | -2.03       | 7.25E-05      |
| 40       | 104423_at   | 2810047L02Rik | Denticleless homolog (Drosophila)                                                | -2.09       | 3.11E-04      |
| 40       | 93099_f_at  | Plk1          | Polo-like kinase 1 (Drosophila)                                                  | -2.15       | 1.70E-03      |



|    |             |               |                                                                               |        |          |
|----|-------------|---------------|-------------------------------------------------------------------------------|--------|----------|
| 40 | 99564_at    | Uhrf1         | Ubiquitin-like containing PHD and RING finger domains 1                       | -2.19  | 3.02E-03 |
| 40 | 104322_at   | Ckap2         | Cytoskeleton associated protein 2                                             | -2.22  | 3.99E-04 |
| 40 | 94805_f_at  | Hist1h2ac     | Histone 1 H2ac                                                                | -2.24  | 1.22E-03 |
| 40 | 96680_at    | Dnajb9        | Dnaj (Hsp40) homolog subfamily B member 9                                     | -2.24  | 1.92E-03 |
| 40 | 100612_at   | Rrm1          | Ribonucleotide reductase M1                                                   | -2.26  | 2.31E-03 |
| 40 | 98996_at    | Plk4          | Polo-like kinase 4 (Drosophila)                                               | -2.35  | 5.35E-03 |
| 40 | 95753_at    | A730011O11Rik | Non-SMC condensin I complex subunit H                                         | -2.36  | 2.08E-03 |
| 40 | 93237_s_at  | Tyms-ps       | Thymidylate synthase                                                          | -2.38  | 2.61E-03 |
| 40 | 101538_i_at | Ces3          | Carboxylesterase 3                                                            | -2.43  | 9.19E-03 |
| 40 | 102354_at   | Tcf19         | Transcription factor 19                                                       | -2.43  | 9.93E-03 |
| 40 | 160496_s_at | Mcm3          | Minichromosome maintenance deficient 3 (S. cerevisiae)                        | -2.53  | 3.76E-03 |
| 40 | 100116_at   | 2810417H13Rik | RIKEN cDNA 2810417H13 gene                                                    | -2.57  | 1.48E-03 |
| 40 | 160755_at   | Kif2c         | Kinesin family member 2C                                                      | -2.57  | 1.72E-04 |
| 40 | 99578_at    | Top2a         | Topoisomerase (DNA) II alpha                                                  | -2.6   | 1.50E-03 |
| 40 | 103821_at   | Cdc6          | Cell division cycle 6 homolog (S. cerevisiae)                                 | -2.63  | 5.08E-04 |
| 40 | 97295_at    | D4Ert421e     | Cell division cycle associated 8                                              | -2.64  | 2.86E-03 |
| 40 | 96710_at    | H2av          | H2A histone family member V                                                   | -2.72  | 4.48E-04 |
| 40 | 100955_at   | 2700084L22Rik | Ubiquitin-conjugating enzyme E2T (putative)                                   | -2.76  | 2.85E-03 |
| 40 | 101521_at   | Birc5         | Baculoviral IAP repeat-containing 5                                           | -2.76  | 6.03E-04 |
| 40 | 97468_at    | Cks1          | CDC28 protein kinase 1b                                                       | -2.79  | 6.28E-03 |
| 40 | 96784_at    | Anln          | Anillin actin binding protein (scraps homolog Drosophila)                     | -2.82  | 3.59E-03 |
| 40 | 160648_at   | Fign1         | Fidgetin-like 1                                                               | -2.86  | 2.89E-03 |
| 40 | 96016_at    | 2700094K13Rik | thioredoxin domain containing 14                                              | -2.97  | 4.86E-03 |
| 40 | 100885_at   | Nek2          | NIMA (never in mitosis gene a)-related expressed kinase 2                     | -3.02  | 3.63E-03 |
| 40 | 94294_at    | Ccnb2         | Cyclin B2                                                                     | -3.21  | 1.90E-04 |
| 40 | 160501_at   | Kif20a        | Kinesin family member 20A                                                     | -3.33  | 1.49E-03 |
| 40 | 93250_r_at  | Hmgb2         | High mobility group box 2                                                     | -3.34  | 3.31E-03 |
| 40 | 162457_f_at | Hba-a1        | Hemoglobin alpha adult chain 1                                                | -3.52  | 3.12E-03 |
| 40 | 101954_at   | H2afz         | H2A histone family member Z                                                   | -3.66  | 2.10E-03 |
| 40 | 161000_i_at | Nusap1        | Nucleolar and spindle associated protein 1                                    | -3.91  | 4.50E-03 |
| 40 | 99632_at    | Mad211        | MAD2 (mitotic arrest deficient homolog)-like 1 (yeast)                        | -4.39  | 3.90E-03 |
| 40 | 97327_at    | Fen1          | Flap structure specific endonuclease 1                                        | -4.46  | 4.39E-03 |
| 40 | 94795_at    | Hsd3b4        | Hydroxy-delta-5-steroid dehydrogenase 3 beta- and steroid delta-isomerase 5   | -4.89  | 7.94E-03 |
| 40 | 92639_at    | Stk6          | Aurora kinase A                                                               | -5.1   | 1.16E-03 |
| 40 | 100156_at   | Mcm5          | Minichromosome maintenance deficient 5 cell division cycle 46 (S. cerevisiae) | -5.3   | 6.37E-03 |
| 40 | 96319_at    | Cdc20         | Cell division cycle 20 homolog (S. cerevisiae)                                | -5.7   | 1.08E-04 |
| 40 | 160159_at   | Ccnb1         | Cyclin B1                                                                     | -5.84  | 1.53E-03 |
| 40 | 93019_at    | H2afx         | H2A histone family member X                                                   | -6.48  | 6.55E-03 |
| 40 | 102001_at   | Rrm2          | Ribonucleotide reductase M2                                                   | -7.54  | 5.83E-03 |
| 40 | 94781_at    | Hba-a1        | Hemoglobin alpha adult chain 1                                                | -11.6  | 5.00E-03 |
| 40 | 101869_s_at | Hbb-b1        | hemoglobin beta adult major chain                                             | -13.31 | 6.06E-03 |
| 40 | 101577_at   | Rps6          | Ribosomal Protein S6                                                          | -16.29 | 1.10E-04 |
